# Supplementary material for: Thermodynamic and Kinetic Sequence Selection in Enzyme-Free Polymer Self-Assembly inside a Non-equilibrium RNA Reactor
Source: Life (Basel). 2022 Apr 10;12(4):567. doi: 10.3390/life12040567 (PMC9032526; doi:10.3390/life12040567)
Supplement: Supplementary file 1 [file life-12-00567-s001.zip]

Archive with 26 entries (26 files):
- FIGS10_LIFE.pdf
- FIGS11_LIFE.pdf
- FIGS12_LIFE.pdf
- FIGS13_LIFE.pdf
- FIGS14_LIFE.pdf
- FIGS15_LIFE.pdf
- FIGS17_LIFE.pdf
- FIGS18_LIFE.pdf
- FIGS19_LIFE.pdf
- FIGS1_LIFE.pdf
- FIGS20_LIFE.pdf
- FIGS21_LIFE.pdf
- FIGS22_LIFE.pdf
- FIGS23_LIFE.pdf
- FIGS2_LIFE.pdf
- FIGS3_LIFE.pdf
- FIGS4_LIFE.pdf
- FIGS5_LIFE.pdf
- FIGS6_LIFE.pdf
- FIGS7_LIFE.pdf
- FIGS8_LIFE.pdf
- FIGS9_LIFE.pdf
- FIGSX1_LIFE.pdf
- FIGSY1_LIFE.pdf
- separate_supplement.pdf
- separate_supplement.tex
